# Supplementary material for: STAT5 is a key transcription factor for IL-3-mediated inhibition of RANKL-induced osteoclastogenesis
Source: PubMed Central journal article supplement (PMC4971530; doi:10.1038/srep30977), 2016-08-03

**STAT5 is a key transcription factor for IL-3-mediated inhibition of  
RANKL-induced osteoclastogenesis**

Jongwon Lee<sup>1,5</sup>, Semun Seong<sup>1,2,5</sup>, Jung Ha Kim<sup>1</sup>, Kabsun Kim<sup>1</sup>, Inyoung Kim<sup>1</sup>, Byung-chul  
Jeong<sup>1,2</sup>, Kwang-Il Nam<sup>3</sup>, Kyung Keun Kim<sup>1</sup>, Lothar Hennighausen<sup>4</sup>, Nacksung Kim<sup>1,2,\*</sup>

**A**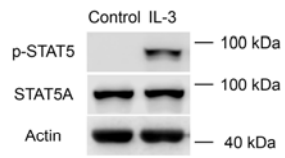**B**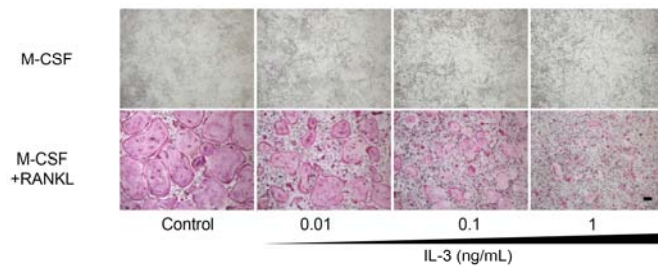**C**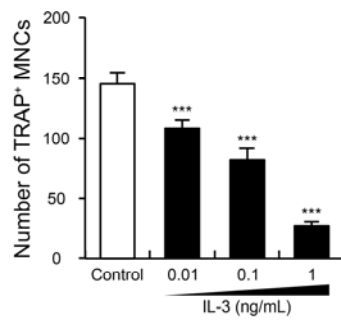

**Supplementary Figure 1. IL-3 inhibits RANKL-mediated osteoclastogenesis.** (A) BMMs were cultured for one day with IL-3. Whole cell lysates were harvested from cultured cells and were immunoblotted with the indicated antibodies. (B-C) BMMs were cultured for three days with M-CSF and RANKL in the presence of various concentrations of IL-3 as indicated. (B) Cultured cells were stained for TRAP. (C) The number of TRAP-positive MNCs per well was counted. Data are represented as the mean  $\pm$  SD. \*\*\*,  $P < 0.001$  vs. control;  $n = 4$ . Bar: 100  $\mu\text{m}$ . All results are representative of at least three independent experiments. Statistical analyses were performed using ANOVA.

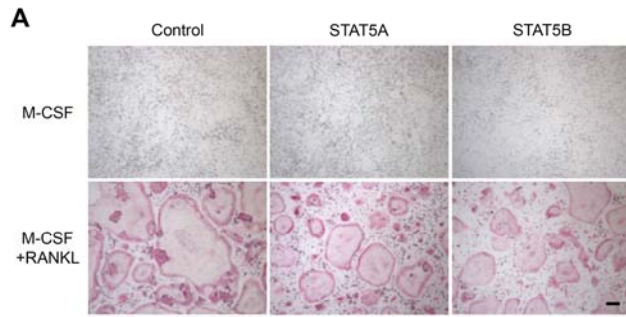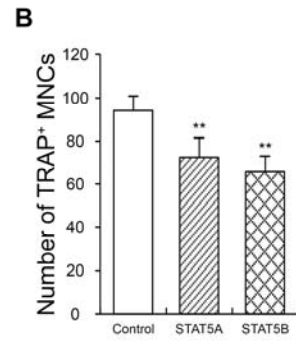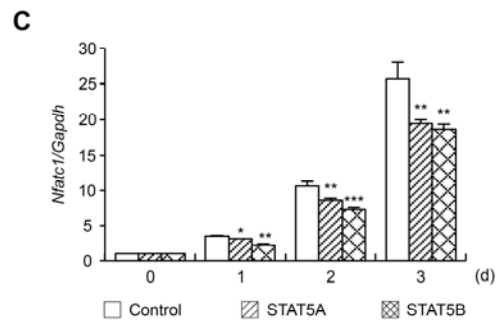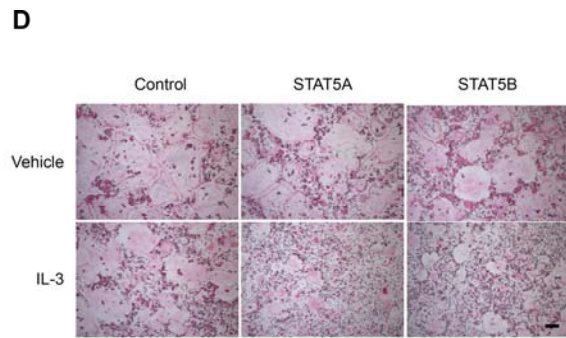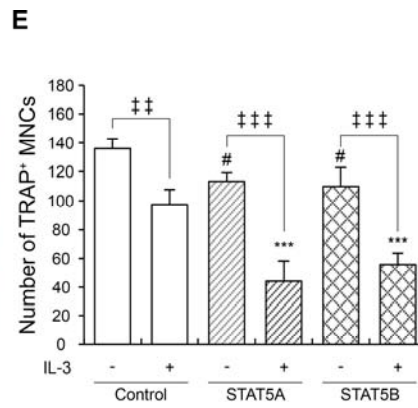

**Supplementary Figure 2. Redundant roles of STAT5A and STAT5B in RANKL-induced osteoclastogenesis.** (A-B) BMMs were transduced with pMX-IRES-EGFP (control), STAT5A, or STAT5B retrovirus and cultured with M-CSF for three days in the presence or absence of RANKL as indicated. (A) Cultured cells were stained for TRAP. (B) The number of TRAP-positive MNCs per well was counted. Data are represented as the mean  $\pm$  SD. \*\*,  $P < 0.01$  vs. control;  $n = 4$ . (C) BMMs were transduced with pMX-IRES-EGFP (control), STAT5A, or STAT5B retrovirus and cultured with M-CSF and RANKL for the indicated times. mRNA levels of *Naftc1* were assessed by quantitative real-time PCR. Data represent mean  $\pm$  SD of triplicate samples. \*,  $P < 0.05$ ; \*\*,  $P < 0.01$ ; \*\*\*,  $P < 0.001$ ; vs. control. (D-E) BMMs were transduced with pMX-IRES-EGFP (control), STAT5A, or STAT5B retrovirus and cultured with M-CSF and RANKL for three days in the presence or absence of IL-3 as indicated. (D) Cultured cells were stained for TRAP. (E) The number of TRAP-positive MNCs per well was counted. Data are represented as the mean  $\pm$  SD. #,  $P < 0.05$ ; vs. IL-3-untreated control, \*\*\*,  $P < 0.001$  vs. IL-3-treated control; ††,  $P < 0.01$ ; †††,  $P < 0.001$  versus the indicated lines;  $n = 4$ . Bars: (A and D) 100  $\mu$ m. All results are representative of at least three independent experiments. All statistical analyses were performed using ANOVA.

**A**

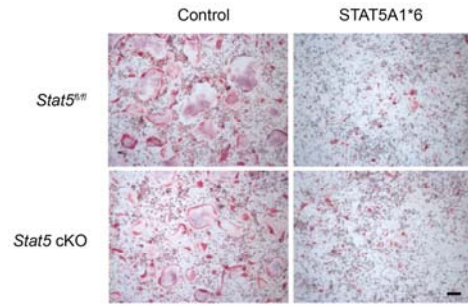

**B**

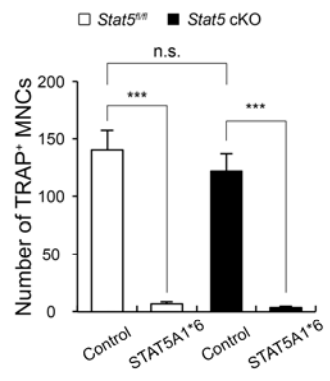

**Supplementary Figure 3. STAT5A activation is sufficient to inhibit osteoclastogenesis independent of STAT5B.** (A-B) Bone marrow cells were harvested from the long bones of *Stat5* cKO. BMMs were transduced with pMX-IRES-EGFP (control) or constitutively active STAT5A (STAT5A1\*6) retrovirus and cultured with M-CSF and RANKL for three days. (A) Cultured cells were stained for TRAP. (B) The number of TRAP-positive MNCs per well was counted. Data are represented as the mean  $\pm$  SD. \*\*\*,  $P < 0.001$  vs. control; n.s., not significant;  $n = 4$ . Bar: 100  $\mu$ m. All results are representative of at least three independent experiments. Statistical analyses were performed using ANOVA.





**Supplementary Figure 4. Conversion of cell fate to dendritic cells by STAT5 activation.**

BMMs transduced with pMX-IRES-EGFP (control) or STAT5A1\*6 retrovirus were cultured with M-CSF in the presence or absence of RANKL for three days and collected. The collected cells were stained with anti-CD80, anti-CD86, anti-MHC class II, and anti-CD11c antibodies and analyzed by fluorescence-activated cell sorting. Results are representative of at least three independent experiments.

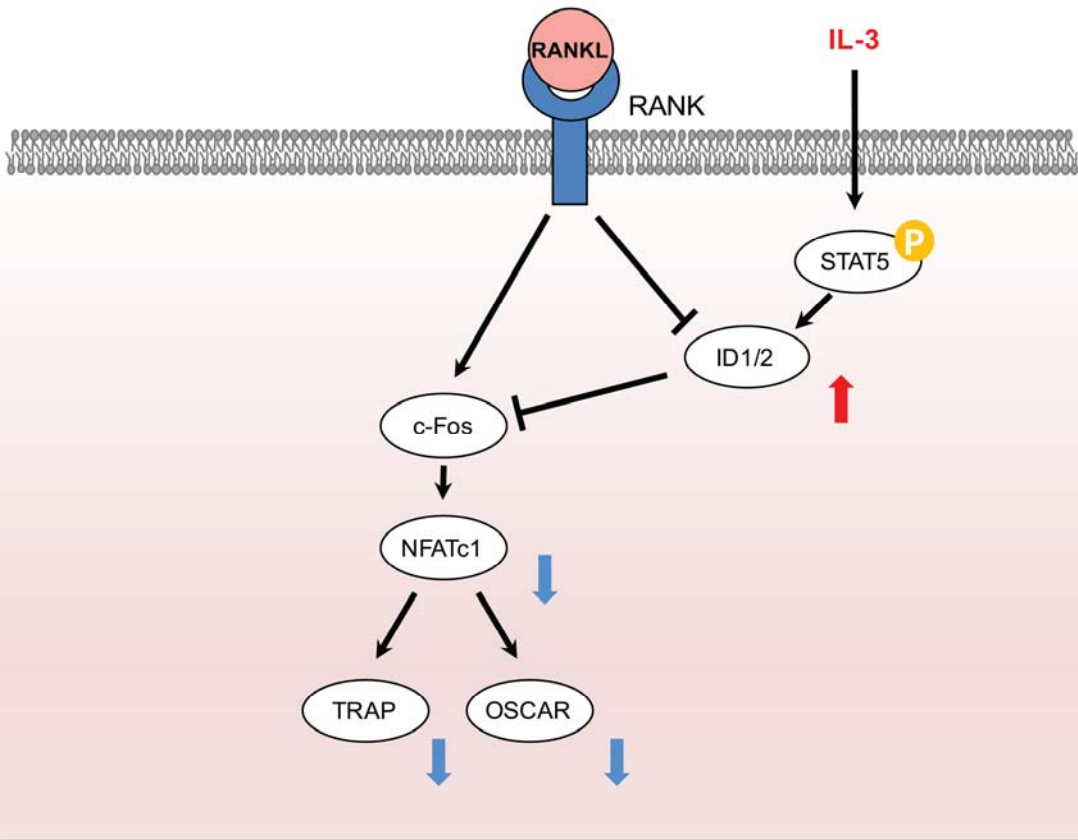

**Supplementary Figure 5. Proposed model for the role of STAT5 in osteoclastogenesis.**

Summary of RANKL-induced osteoclast differentiation and the mechanism of IL-3-induced inhibition of osteoclast differentiation via STAT5-Id. Under normal physiological conditions, binding of RANKL to RANK induces c-Fos, which upregulates NFATc1, a master regulator of osteoclastogenesis, and its downstream signals such as *TRAP*, *OSCAR*, *etc.* This signaling pathway is interrupted when IL-3 phosphorylates STAT5 and the activated STAT5 induces ID1/2, which in turn downregulates c-Fos and its downstream signals, which ultimately results in attenuated osteoclastogenesis.

**Supplementary Table 1. Gene expression changes in RANKL-mediated osteoclast differentiation and IL-3-mediated inhibition of osteoclast differentiation.**

| Category                                                                                                                                              | Gene_symbol   | Gene expression fold change |                                        |                                             |
|-------------------------------------------------------------------------------------------------------------------------------------------------------|---------------|-----------------------------|----------------------------------------|---------------------------------------------|
|                                                                                                                                                       |               | WT-M-CSF-RANKL vs. WT-M-CSF | WT-M-CSF-RANKL-IL-3 vs. WT-M-CSF-RANKL | KO-M-CSF-RANKL-IL-3 vs. WT-M-CSF-RANKL-IL-3 |
| WT-M-CSF-RANKL vs. WT-M-CSF (down)<br>and<br>WT-M-CSF-RANKL-IL-3 vs. WT-M-CSF-RANKL (up)<br>and<br>KO-M-CSF-RANKL-IL-3 vs. WT-M-CSF-RANKL-IL-3 (down) | AA467197      | -3.204772                   | 12.343473                              | -4.30564                                    |
|                                                                                                                                                       | Alox5         | -3.078875                   | 4.268578                               | -3.558701                                   |
|                                                                                                                                                       | Ang           | -10.194463                  | 3.650933                               | -3.570706                                   |
|                                                                                                                                                       | Anxa3         | -7.258497                   | 7.393438                               | -3.915549                                   |
|                                                                                                                                                       | Arg1          | -7.277787                   | 109.872002                             | -35.973683                                  |
|                                                                                                                                                       | Arhgap25      | -4.475555                   | 5.153716                               | -3.801109                                   |
|                                                                                                                                                       | Atf3          | -9.616502                   | 9.709122                               | -7.180086                                   |
|                                                                                                                                                       | Atp6v0a1      | -7.591318                   | 11.568932                              | -5.660032                                   |
|                                                                                                                                                       | Atp6v0a1      | -5.363165                   | 7.559801                               | -4.396774                                   |
|                                                                                                                                                       | AU022793      | -4.439623                   | 21.839085                              | -10.29531                                   |
|                                                                                                                                                       | B430306N03Rik | -7.39276                    | 7.154513                               | -3.776136                                   |
|                                                                                                                                                       | Bcl2a1b       | -3.794083                   | 19.245227                              | -21.721051                                  |
|                                                                                                                                                       | Bcl2l1        | -11.122434                  | 8.210381                               | -4.482407                                   |
|                                                                                                                                                       | Bcl2l1        | -7.265129                   | 8.66144                                | -4.158217                                   |
|                                                                                                                                                       | C1qa          | -15.040143                  | 7.474966                               | -3.748695                                   |
|                                                                                                                                                       | C1qb          | -10.313852                  | 4.929246                               | -6.239563                                   |
|                                                                                                                                                       | C1qc          | -10.231077                  | 4.31271                                | -3.513921                                   |
|                                                                                                                                                       | Ccl12         | -22.223777                  | 242.879248                             | -9.819019                                   |
|                                                                                                                                                       | Ccl2          | -18.075896                  | 48.901042                              | -5.832743                                   |
|                                                                                                                                                       | Ccl3          | -3.749232                   | 34.452754                              | -10.053547                                  |
|                                                                                                                                                       | Ccl4          | -19.927549                  | 99.107158                              | -11.82831                                   |
|                                                                                                                                                       | Ccl6          | -11.64122                   | 210.069574                             | -41.536871                                  |
|                                                                                                                                                       | Ccl7          | -31.820448                  | 167.568698                             | -7.840487                                   |
|                                                                                                                                                       | Ccr2          | -5.553874                   | 5.145877                               | -5.661242                                   |
|                                                                                                                                                       | Ccr5          | -5.765497                   | 8.743835                               | -6.095364                                   |
|                                                                                                                                                       | Cd200r1       | -4.068562                   | 8.353642                               | -5.847812                                   |
|                                                                                                                                                       | Cd300lf       | -11.746858                  | 31.272067                              | -8.688648                                   |
|                                                                                                                                                       | Cd300lf       | -3.92102                    | 9.421184                               | -6.913499                                   |

|        |            |           |            |
|--------|------------|-----------|------------|
| Cd84   | -3.410261  | 4.323763  | -4.672291  |
| Cd84   | -4.728823  | 5.625843  | -4.144187  |
| Cep250 | -4.258908  | 4.975471  | -4.261925  |
| Ch25h  | -21.620895 | 55.58655  | -9.64555   |
| Cmklr1 | -5.197711  | 9.885982  | -6.128512  |
| Cndp2  | -4.764804  | 6.412249  | -3.08357   |
| Cnr2   | -3.056071  | 4.968549  | -4.435651  |
| Ctsh   | -3.219848  | 3.460654  | -4.48648   |
| Dab2   | -9.529592  | 6.91415   | -3.056564  |
| Dnmt3l | -4.611788  | 6.849288  | -4.209885  |
| Fam20c | -4.029736  | 8.110167  | -6.146261  |
| Fcgr1  | -17.128146 | 11.836058 | -4.039028  |
| Fcgr3  | -8.976882  | 13.13273  | -5.916132  |
| Fn1    | -5.767593  | 5.898017  | -7.024515  |
| Fn1    | -3.477186  | 6.380904  | -5.934579  |
| Fn1    | -7.06525   | 5.197604  | -4.593518  |
| Fn1    | -4.860589  | 3.220314  | -4.172795  |
| Fn1    | -3.929027  | 5.326355  | -4.112473  |
| Gdf15  | -3.123662  | 5.359159  | -3.419765  |
| H2-DMa | -3.484855  | 7.263071  | -6.552643  |
| Hal    | -9.458547  | 9.027426  | -4.848071  |
| Hlx    | -3.109511  | 4.429881  | -3.01627   |
| Hmga1  | -10.023472 | 11.778641 | -12.018328 |
| Hmxo1  | -6.475946  | 5.084216  | -3.143732  |
| Icosl  | -6.749219  | 4.463312  | -3.103888  |
| Id1    | -15.145906 | 13.539643 | -4.997802  |
| Id2    | -5.797508  | 8.816544  | -5.219676  |
| Il21r  | -4.137183  | 6.138872  | -4.157938  |
| Irf8   | -9.328849  | 6.539895  | -3.679706  |
| Kctd12 | -4.057421  | 6.302394  | -3.322494  |
| Litaf  | -3.175425  | 4.610565  | -3.620559  |
| Maf    | -14.06373  | 6.633199  | -3.309991  |
| Mertk  | -5.174899  | 4.870496  | -3.500171  |
| Mgst1  | -5.063172  | 4.664832  | -5.001095  |
| Mrc1   | -5.35804   | 7.238886  | -3.990227  |
| Nxpe5  | -4.010395  | 5.358019  | -4.344138  |
| Pf4    | -6.063321  | 14.184867 | -6.431475  |
| Pilra  | -5.078432  | 8.439752  | -3.362338  |
| Plek   | -3.821644  | 5.455437  | -3.00209   |

|         |                                                                                                                                                                                        |             |            |            |
|---------|----------------------------------------------------------------------------------------------------------------------------------------------------------------------------------------|-------------|------------|------------|
|         | Psap                                                                                                                                                                                   | -141.941266 | 215.840179 | -5.744513  |
|         | Ptgs1                                                                                                                                                                                  | -3.681428   | 9.812489   | -6.384626  |
|         | Rab3il1                                                                                                                                                                                | -11.431955  | 7.209147   | -3.72051   |
|         | Rhob                                                                                                                                                                                   | -3.837444   | 4.962606   | -3.662089  |
|         | Rnase6                                                                                                                                                                                 | -4.37949    | 3.235004   | -3.047195  |
|         | Rnase1                                                                                                                                                                                 | -3.32473    | 5.928657   | -4.867796  |
|         | Slc15a3                                                                                                                                                                                | -11.630782  | 15.919331  | -5.335479  |
|         | Slc36a1                                                                                                                                                                                | -3.053709   | 3.839491   | -3.15042   |
|         | Slc40a1                                                                                                                                                                                | -20.945115  | 16.528046  | -7.577392  |
|         | Tbxas1                                                                                                                                                                                 | -4.306787   | 4.338054   | -4.146963  |
|         | Tlr1                                                                                                                                                                                   | -3.200308   | 5.423097   | -5.013597  |
|         | Tlr8                                                                                                                                                                                   | -7.31868    | 4.726743   | -3.224056  |
|         | Tmem132a                                                                                                                                                                               | -6.544304   | 9.374055   | -4.865452  |
|         | Tmem154                                                                                                                                                                                | -4.984457   | 9.923224   | -7.001715  |
|         | Tmem37                                                                                                                                                                                 | -7.724976   | 3.205014   | -3.092214  |
|         | Trem1                                                                                                                                                                                  | -6.133213   | 9.081651   | -3.933309  |
|         | Zranb3                                                                                                                                                                                 | -9.780071   | 11.305611  | -7.562593  |
|         | Zyx                                                                                                                                                                                    | -3.145585   | 5.469068   | -3.70631   |
|         | <b>WT-M-CSF-RANKL vs. WT-M-CSF (up)</b><br><b>and</b><br><b>WT-M-CSF-RANKL-IL-3 vs. WT-M-CSF-RANKL (down)</b><br><b>and</b><br><b>KO-M-CSF-RANKL-IL-3 vs. WT-M-CSF-RANKL-IL-3 (up)</b> | Acp5        | 72.542687  | -23.308944 |
| Avpi1   |                                                                                                                                                                                        | 3.904183    | -3.807859  | 3.261959   |
| Bbs9    |                                                                                                                                                                                        | 8.022205    | -3.888928  | 3.566136   |
| Bdh2    |                                                                                                                                                                                        | 3.166562    | -5.521662  | 3.284488   |
| Cav1    |                                                                                                                                                                                        | 9.111685    | -5.883492  | 3.200653   |
| Cav1    |                                                                                                                                                                                        | 11.990228   | -5.400171  | 3.150264   |
| Cd82    |                                                                                                                                                                                        | 3.533061    | -3.650205  | 4.674451   |
| Ctsk    |                                                                                                                                                                                        | 75.454743   | -12.80813  | 3.851024   |
| Dusp9   |                                                                                                                                                                                        | 5.5049      | -5.913806  | 3.457609   |
| Fam83g  |                                                                                                                                                                                        | 5.089386    | -4.276312  | 3.260021   |
| Gfi1b   |                                                                                                                                                                                        | 5.56785     | -4.007287  | 3.579352   |
| Gfra2   |                                                                                                                                                                                        | 13.724001   | -10.860133 | 6.551509   |
| Gfra2   |                                                                                                                                                                                        | 5.637937    | -3.772141  | 3.284024   |
| Gja1    |                                                                                                                                                                                        | 3.778619    | -6.978433  | 4.616275   |
| Gm11545 |                                                                                                                                                                                        | 3.519081    | -4.332652  | 4.313536   |
| Gtf3c5  |                                                                                                                                                                                        | 6.60216     | -3.923702  | 3.214448   |
| Igsf11  |                                                                                                                                                                                        | 3.760873    | -3.558916  | 3.011648   |
| Jdp2    |                                                                                                                                                                                        | 32.548581   | -12.319083 | 7.114027   |
| Jdp2    |                                                                                                                                                                                        | 18.431914   | -9.464058  | 6.51116    |
| Lamc2   |                                                                                                                                                                                        | 5.095735    | -4.490866  | 3.243346   |
| Lphn2   |                                                                                                                                                                                        | 4.862458    | -3.092864  | 3.395416   |

|                                                                         |           |           |            |           |
|-------------------------------------------------------------------------|-----------|-----------|------------|-----------|
|                                                                         | Mmp14     | 12.89212  | -5.249274  | 3.30948   |
|                                                                         | Mmp9      | 16.84516  | -7.494702  | 4.071386  |
|                                                                         | Mustn1    | 6.606894  | -4.886056  | 3.015609  |
|                                                                         | Mycl      | 16.905582 | -6.923258  | 6.113919  |
|                                                                         | Nfatc1    | 97.372702 | -37.164703 | 17.161056 |
|                                                                         | Nfatc1    | 8.535158  | -5.425237  | 3.648573  |
|                                                                         | Nolc1     | 8.036622  | -8.427702  | 9.31993   |
|                                                                         | Nox1      | 7.688506  | -5.489285  | 3.776971  |
|                                                                         | Nrp2      | 8.551599  | -7.50853   | 3.778248  |
|                                                                         | Nrp2      | 5.628992  | -5.603937  | 3.638669  |
|                                                                         | Oaf       | 5.732848  | -4.553084  | 4.792864  |
|                                                                         | Ocstamp   | 21.820044 | -9.998031  | 5.50078   |
|                                                                         | Osbp19    | 6.643192  | -5.038208  | 3.099599  |
|                                                                         | Pde2a     | 5.531907  | -3.553674  | 3.06715   |
|                                                                         | Pltp      | 3.018255  | -5.121849  | 3.321738  |
|                                                                         | Plxna4    | 6.780524  | -6.559659  | 4.438787  |
|                                                                         | Prdm1     | 12.782004 | -9.138299  | 4.147898  |
|                                                                         | Pus10     | 3.098     | -5.78979   | 3.700373  |
|                                                                         | Rcan1     | 8.290801  | -8.117266  | 4.500374  |
|                                                                         | Rgs16     | 6.23316   | -5.700509  | 51.281159 |
|                                                                         | Scin      | 25.013124 | -13.967793 | 8.682338  |
|                                                                         | Sdc1      | 15.629892 | -8.269206  | 5.258236  |
|                                                                         | Sema7a    | 5.372466  | -4.519331  | 7.588241  |
|                                                                         | Sept9     | 13.08068  | -5.534157  | 4.690844  |
|                                                                         | Serpina6b | 14.300244 | -13.475148 | 9.80544   |
|                                                                         | Slc6a4    | 12.109968 | -7.685788  | 5.530507  |
|                                                                         | Slc9b2    | 14.825507 | -13.688978 | 5.257152  |
|                                                                         | Tmem26    | 3.573558  | -3.452836  | 3.97436   |
|                                                                         | Tsc22d1   | 18.64694  | -8.216998  | 4.434437  |
|                                                                         | Vegfc     | 15.72597  | -6.670281  | 5.49483   |
| Zbtb32                                                                  | 7.81553   | -5.929728 | 6.157381   |           |
| <b>and</b><br>WT-M-CSF-<br>RANKL-IL-3<br>vs. WT-M-<br>CSF-RANKL<br>(up) | Arrb2     | 3.263433  | 2.311626   | -7.586969 |

|                                                                                                                                                                  |        |                  |                  |                  |
|------------------------------------------------------------------------------------------------------------------------------------------------------------------|--------|------------------|------------------|------------------|
|                                                                                                                                                                  | Cd274  | <b>4.004952</b>  | <b>2.099275</b>  | <b>-3.169258</b> |
|                                                                                                                                                                  | Il1rn  | <b>6.946865</b>  | <b>2.708472</b>  | <b>-5.262722</b> |
|                                                                                                                                                                  | Socs3  | <b>5.847861</b>  | <b>2.582227</b>  | <b>-2.508697</b> |
| <b>WT-M-CSF-RANKL vs. WT-M-CSF (down)<br/>and<br/>WT-M-CSF-RANKL-IL-3 vs. WT-M-CSF-RANKL (down)<br/>and<br/>KO-M-CSF-RANKL-IL-3 vs. WT-M-CSF-RANKL-IL-3 (up)</b> | Cx3cr1 | <b>-4.508868</b> | <b>-3.572496</b> | <b>4.553183</b>  |



WT-M-CSF-RANKL vs. WT-M-CSF (down)  
 and  
 WT-M-CSF-RANKL-IL-3 vs. WT-M-CSF-RANKL (up)  
 and  
 KO-M-CSF-RANKL-IL-3 vs. WT-M-CSF-RANKL-IL-3 (down)

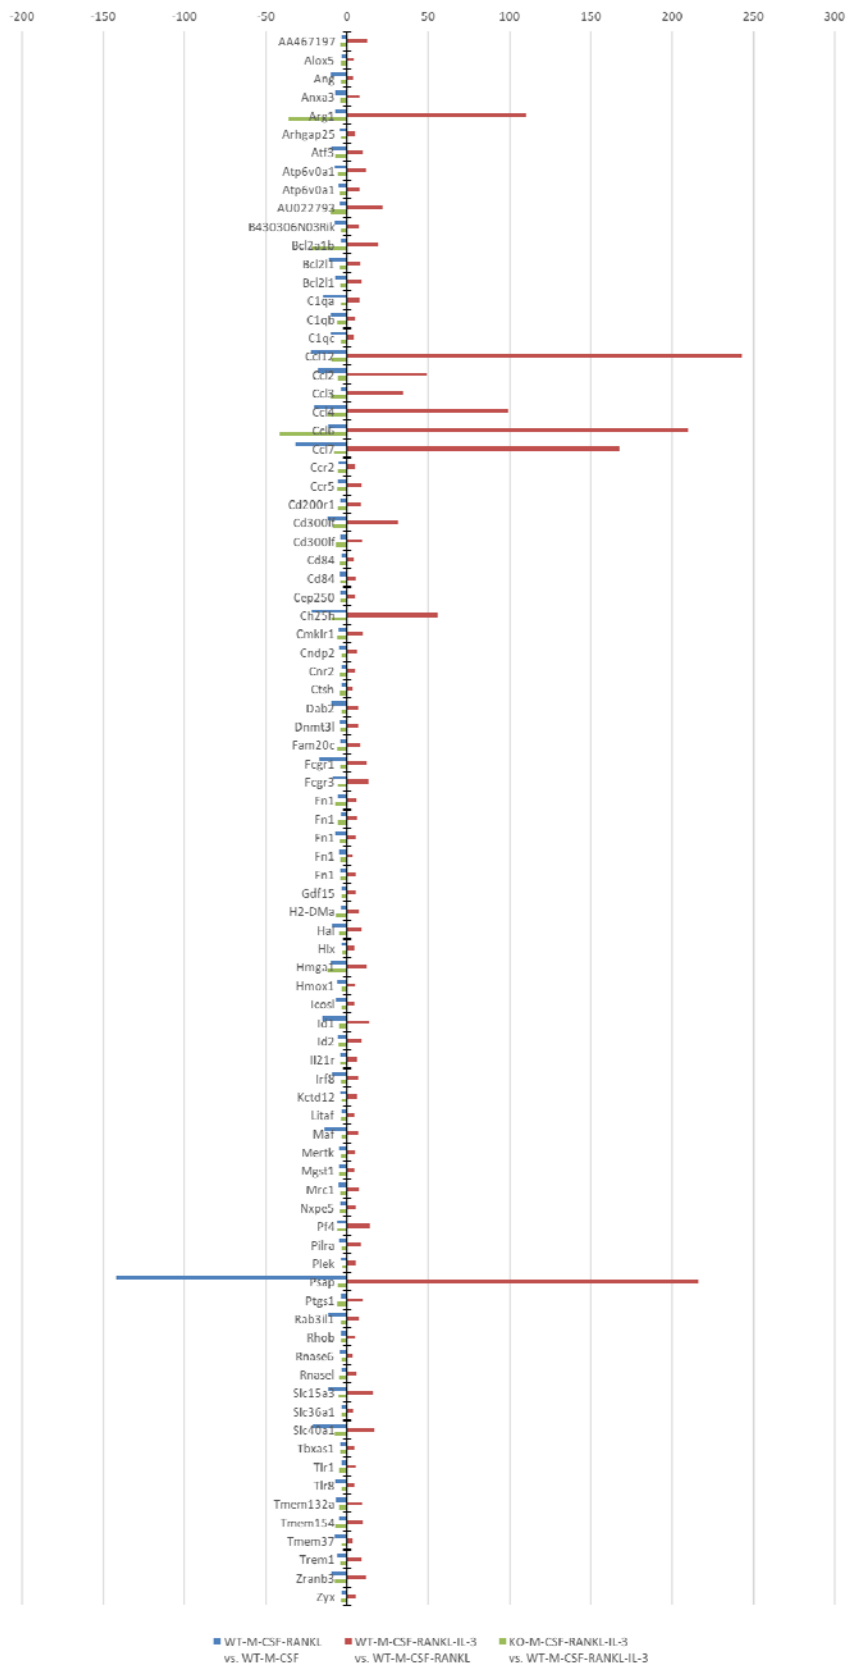

WT-M-CSF-RANKL vs. WT-M-CSF (up)  
 and  
 WT-M-CSF-RANKL-IL-3 vs. WT-M-CSF-RANKL (down)  
 and  
 KO-M-CSF-RANKL-IL-3 vs. WT-M-CSF-RANKL-IL-3 (up)

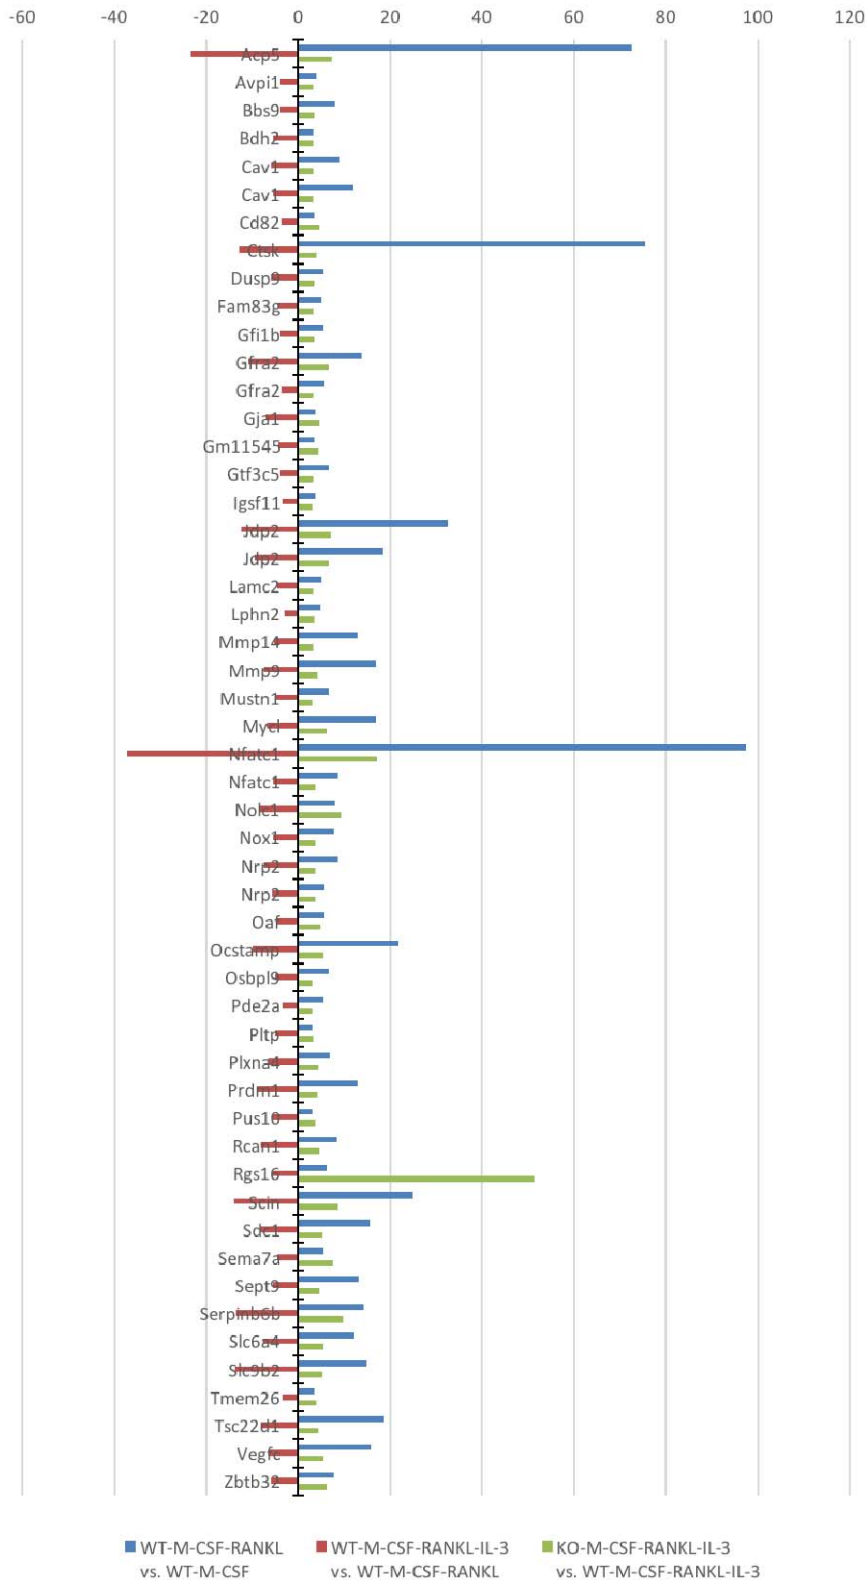

WT-M-CSF-RANKL vs. WT-M-CSF (up)  
 and  
 WT-M-CSF-RANKL-IL-3 vs. WT-M-CSF-RANKL (up)  
 and  
 KO-M-CSF-RANKL-IL-3 vs. WT-M-CSF-RANKL-IL-3 (down)

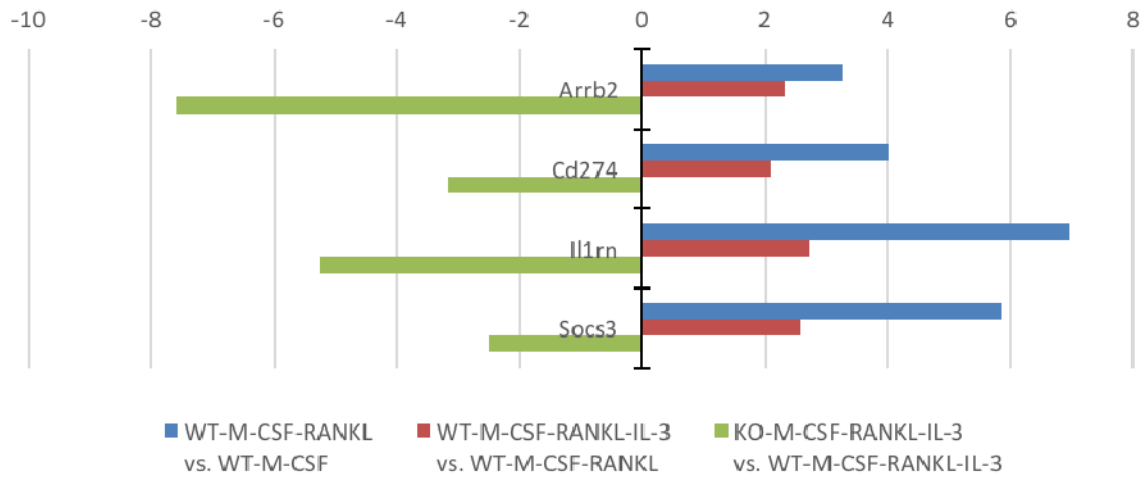

WT-M-CSF-RANKL vs. WT-M-CSF (down)  
 and  
 WT-M-CSF-RANKL-IL-3 vs. WT-M-CSF-RANKL (down)  
 and  
 KO-M-CSF-RANKL-IL-3 vs. WT-M-CSF-RANKL-IL-3 (up)

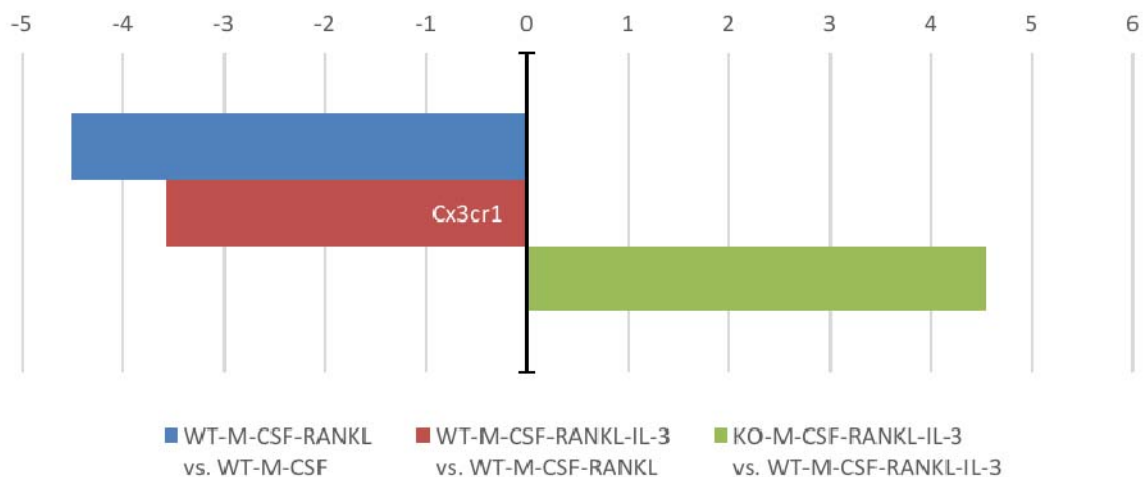

Supplement: srep30977-s1.pdf [file srep30977-s1.pdf]
